# Supplementary material
Source: Springer Nature journal article supplement (https://www.springermedizin.de/resource/supplementary/12998_2008_94_MOESM3_ESM.pdf/9623570)

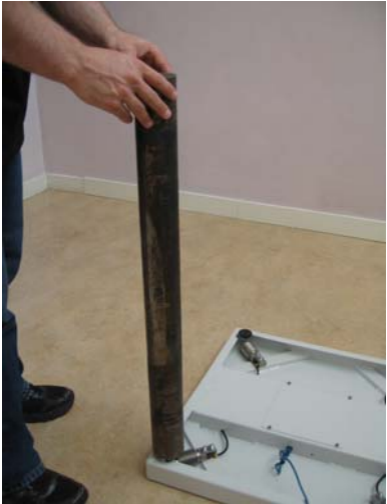

Supplement: MOESM3 [file 9623570]
